# Supplementary material for: Rhodamine B-based ordered mesoporous organosilicas for the selective detection and adsorption of Al(iii)
Source: Royal Society of Chemistry journal article supplement (doi:10.1039/c6nj00393a), 2016-01-01
Supplement: c6nj00393a1.pdf [file c6nj00393a1.pdf]

## Supporting Information

### **Rhodamine B-based ordered mesoporous organosilicas for selective detection and adsorption of Al(III)**

*Lijie Xu,<sup>a</sup> Shuhua Han,<sup>\*a</sup> Yongfeng Hu,<sup>b</sup> James J. Dynes,<sup>b</sup> Lijuan Zhang<sup>c</sup>*

<sup>a</sup> Key Lab of Colloid and Interface Chemistry Ministry of Education, Shandong University, Jinan 250100, P. R. China

<sup>b</sup> Canadian Light Source 44 Innovation Boulevard Saskatoon, SK, S7N 2V3, Canada

<sup>c</sup> Shanghai Synchrotron Radiation Facility, Shanghai Institute of Applied Physics, Chinese Academy of Sciences, Shanghai 201800, China

\*To whom correspondence should be addressed: E-mail: shuhhan@sdu.edu.cn;  
Tel +86-531-88365450; Fax +86-531-88564464

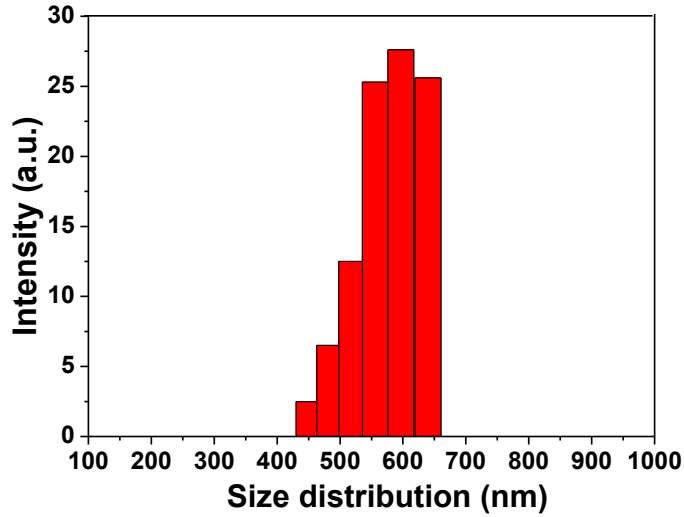

Fig. S1 Size distribution histograms of RBMSiO<sub>2</sub>-20 in ethanol.

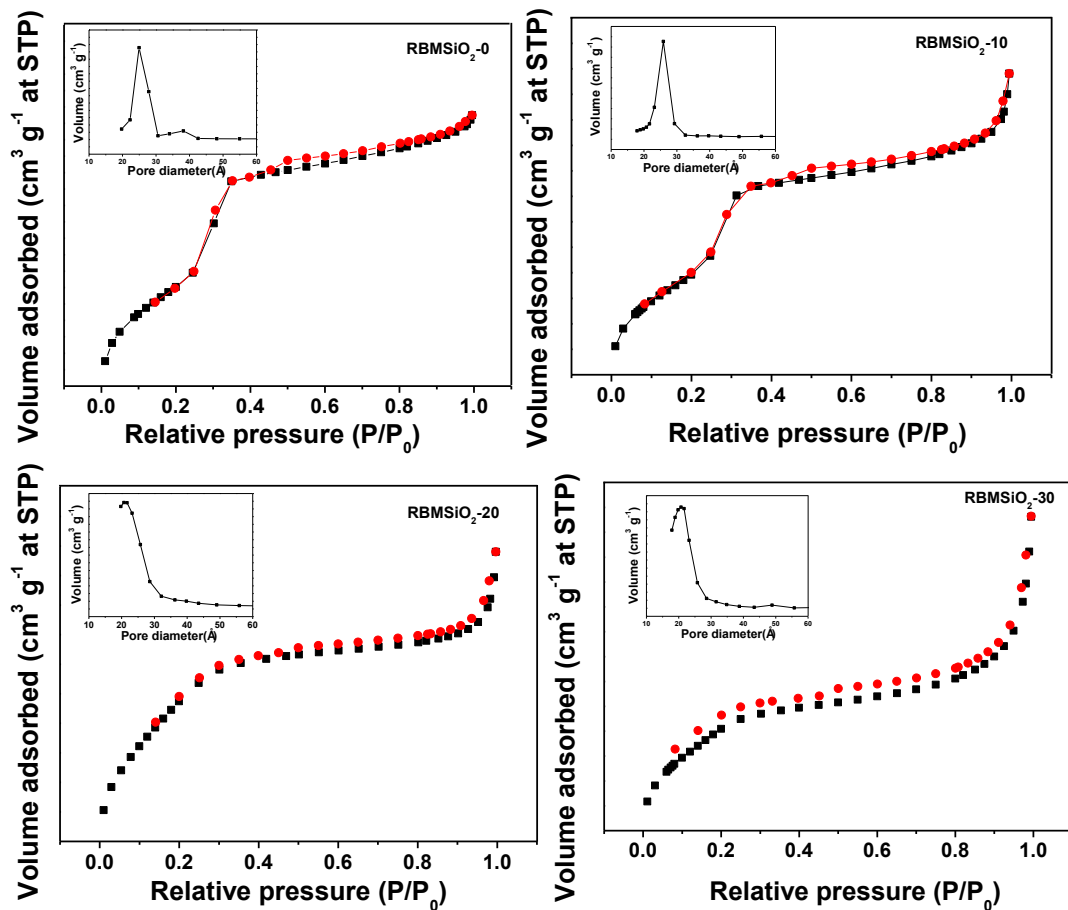

Fig. S2 Nitrogen adsorption/desorption isotherms and corresponding pore size distribution of RBMSiO<sub>2</sub>-0, RBMSiO<sub>2</sub>-10, RBMSiO<sub>2</sub>-20 and RBMSiO<sub>2</sub>-30 after extraction.

**Table S1.** Surface properties of RBMSiO<sub>2</sub> samples.

| Sample                  | $S_{BET}$ (m <sup>2</sup> /g) | $V_t$ (m <sup>3</sup> /g) | $D_{BJH}$ (nm) |
|-------------------------|-------------------------------|---------------------------|----------------|
| RBMSiO <sub>2</sub> -0  | 1041.97                       | 0.79                      | 2.5            |
| RBMSiO <sub>2</sub> -10 | 131.01                        | 0.11                      | 2.5            |
| RBMSiO <sub>2</sub> -20 | 127.44                        | 0.09                      | 2.1            |
| RBMSiO <sub>2</sub> -30 | 46.00                         | 0.05                      | 2.1            |

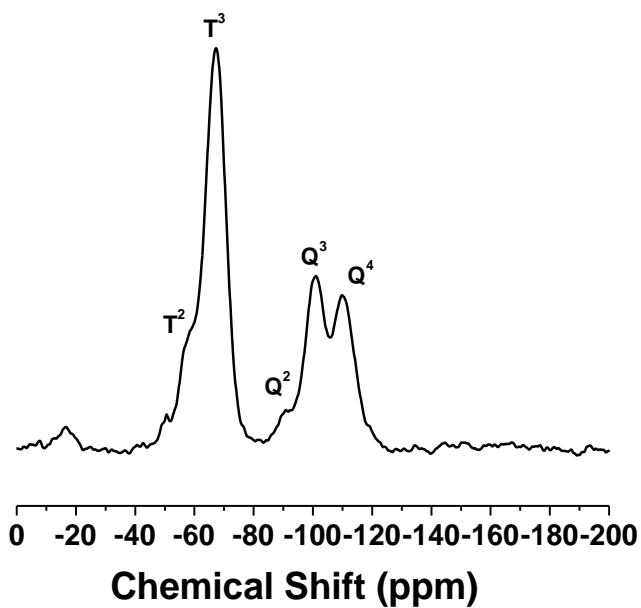

**Fig. S3** <sup>29</sup>Si MAS NMR spectrum of RBMSiO<sub>2</sub>-30.

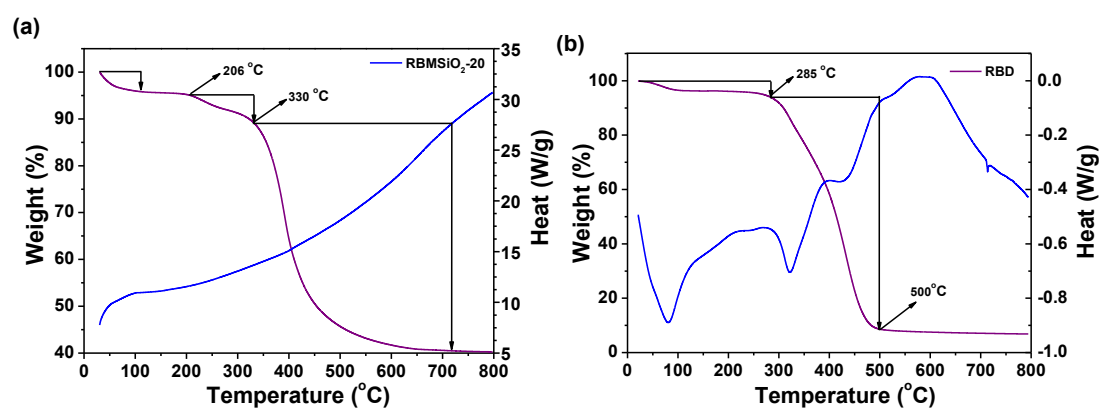

**Fig. S4** TGA / DSC of (a) RBMSiO<sub>2</sub>-20 and (b) RBD.

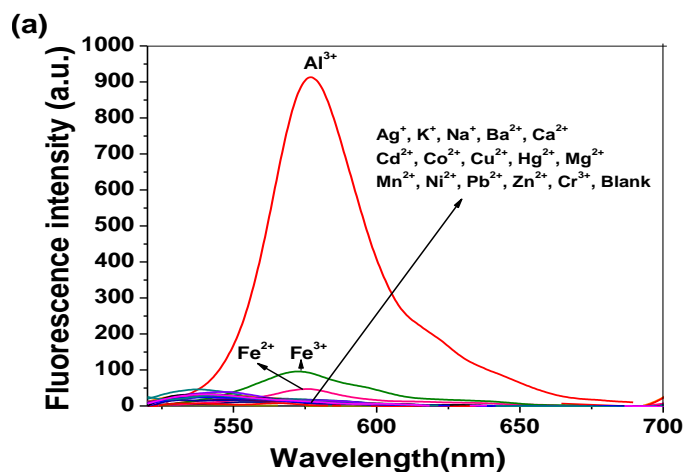

(b)

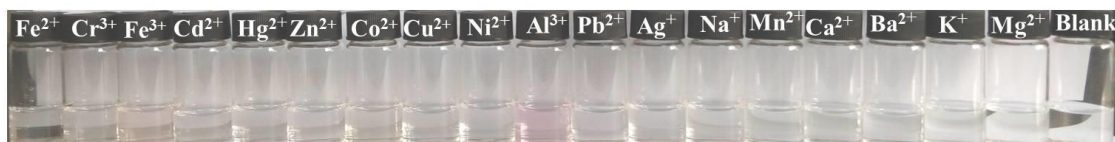

**Fig. S5** (a), Fluorescence spectra of RBD ( $10^{-5}$  mol/L) upon addition of various metal ions ( $10^{-4}$  mol/L) in ethanol. Excitation at 510 nm (Excitation slit width, 3 nm; emission slit width, 2.5 nm). (b) Color changes of RBD in ethanol in the presence of various metal ions ( $10^{-4}$  mol/L).

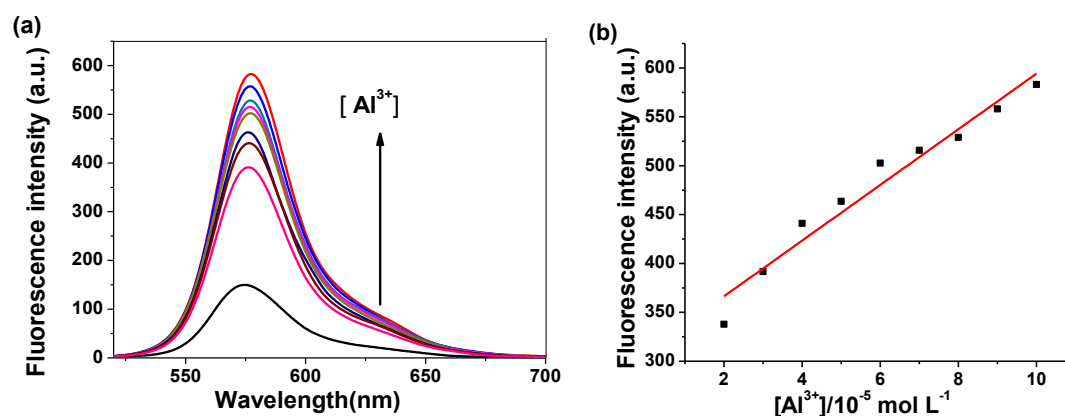

**Fig. S6** (a) Fluorescence spectra of RBMSiO<sub>2</sub>-20 (0.05 mg/mL) upon addition of  $\text{Al}^{3+}$  in ethanol. (b) Emission intensities at 575 nm of RBMSiO<sub>2</sub>-20 (0.05 mg/mL) as a function of  $\text{Al}^{3+}$  concentration in  $10^{-5}$  M range ( $2 \times 10^{-5}$  to  $1 \times 10^{-4}$  mol/L). (Excitation slit width, 5.5 nm; emission slit width, 2.5 nm).

**Table S2** The comparison of this probe with some other fluorescent probes for Al<sup>3+</sup>.

| Probe     | $\lambda_{em}$ (nm) | LOD ( $\mu$ M) | Total metal ions <sup>a</sup> | Interferents                                                              | Recycle <sup>b</sup> |
|-----------|---------------------|----------------|-------------------------------|---------------------------------------------------------------------------|----------------------|
| Ref. [1]  | 442                 | 0.012          | 14                            | No                                                                        | No                   |
| Ref. [2]  | 603                 | 0.5            | 16                            | No                                                                        | Yes                  |
| Ref. [3]  | 400                 | 1.06           | 21                            | Cr <sup>3+</sup> , Co <sup>2+</sup> , Ga <sup>3+</sup> , In <sup>3+</sup> | No                   |
| Ref. [4]  | 443                 | 0.1            | 16                            | No                                                                        | No                   |
| Ref. [5]  | 529                 | 0.1            | 19                            | Ga <sup>3+</sup>                                                          | No                   |
| Ref. [6]  | 398                 | 0.393          | 14                            | No                                                                        | Yes                  |
| Ref. [7]  | 582                 | 0.196          | 21                            | No                                                                        | No                   |
| Ref. [8]  | 637                 | 0.8            | 14                            | No                                                                        | No                   |
| Ref. [9]  | 513                 | 2.4            | 14                            | No                                                                        | No                   |
| Ref. [10] | 560/410             | 38             | 12                            | Fe <sup>3+</sup> , Fe <sup>2+</sup>                                       | No                   |
| This work | 575                 | 0.13           | 18                            | No                                                                        | Yes                  |

<sup>a</sup> The total species of tested interference ions.

<sup>b</sup> Recycling or reproducibility performance.

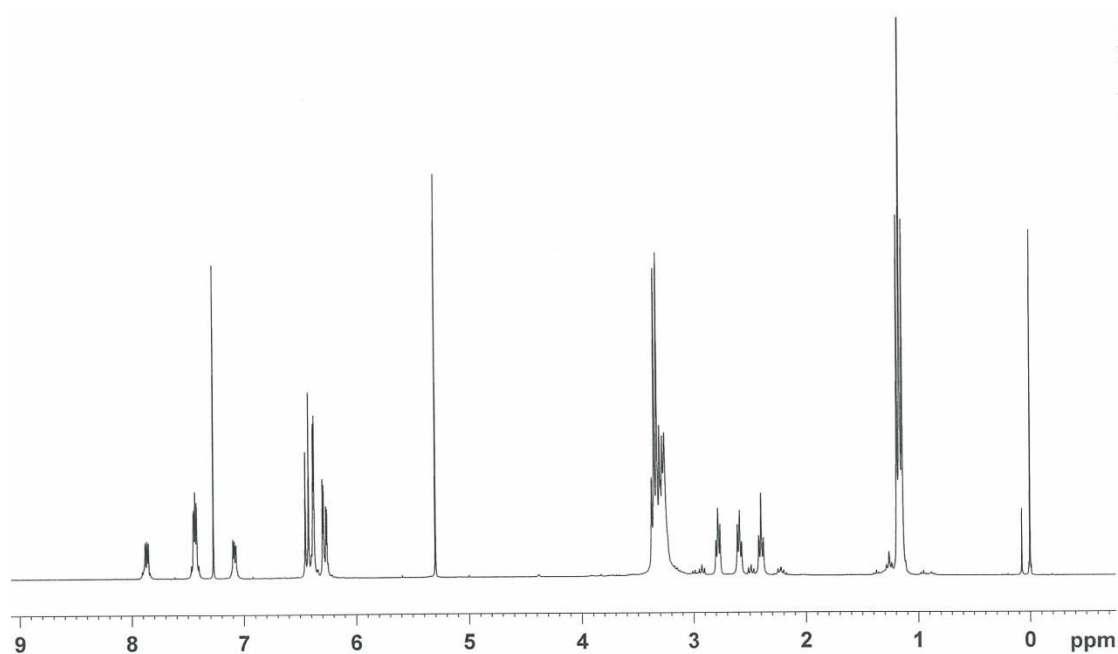**Fig. S7** <sup>1</sup>H-NMR spectra of RBD.

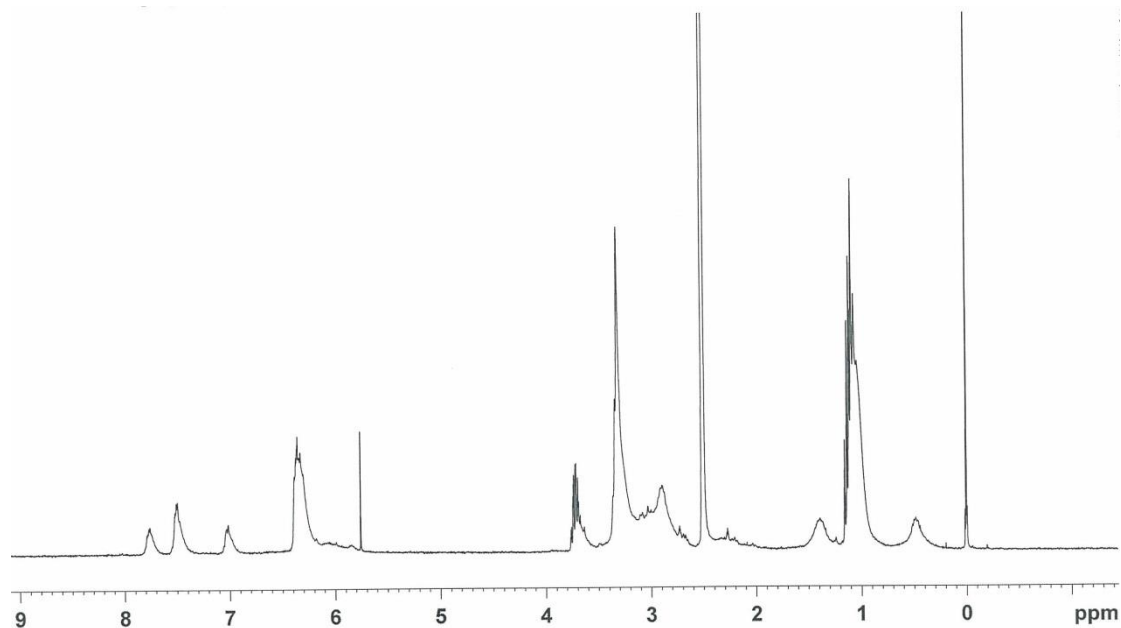

**Fig. S8**  $^1\text{H}$ -NMR spectra of RBSi.

#### References:

- [1] J. Ma, W. Shi, L. Feng, Y. Chen, K. Fan, Y. Hao, Y. Hui and Z. Xie, *RSC Adv.*, 2016, **6**, 28034.
- [2] Y. Lu, S. Huang, Y. Liu, S. He, L. Zhao and X. zeng, *Org. Lett.*, 2011, **13**, 5274.
- [3] X. Sun, Y. W. Wang and Y. Peng, *Org. Lett.*, 2012, **14**, 3420.
- [4] D. Maity and T. Govindaraju, *Inorg. Chem.*, 2010, **49**, 7229.
- [5] H. Xiao, K. Chen, N. Jiang, D. Cui, G. Yin, J. Wang and R. Wang, *Analyst*, 2014, **139**, 1980.
- [6] D. Sarkar, A. Pramanik, S. Biswas, P. Karmakar and T. K. Mondal, *RSC Adv.*, 2014, **4**, 30666.
- [7] X. Bao, Q. Cao, Y. Xu, Y. Gao, Y. Xu, X. Nie, B. Zhou, T. Pang and J. Zhu, *Bioorg. Med. Chem.*, 2015, **23**, 694.
- [8] T. Zhou, L. Lin, M. Rong, Y. Jiang and X. Chen, *Anal. Chem.*, 2013, **85**, 9839.
- [9] W. Ding, D. Wang, X. Zheng, W. Ding, J. Zheng, W. Mu, W. Cao and L. Jin, *Sens. Actuators, B*, 2015, **209**, 359.
- [10] Y. Kim, G. Jang and T. S. Lee, *ACS Appl. Mater. Interfaces*, 2015, **7**, 15649.
